# Supplementary material
Source: PubMed Central journal article supplement (PMC3855897)
Supplement: NIHMS523966-supplement-01.pdf [file NIHMS523966-supplement-01.pdf]

Appendix Table A1: Parity and baseline prevalent TFROA, with zero births as referent.

| Number of Births | Total # Knees | % With ROA | Crude             | Age, BMI, race-Adj. |         | Multi-Adj.*       |         |
|------------------|---------------|------------|-------------------|---------------------|---------|-------------------|---------|
|                  |               |            | RR                | RR                  | p-value | PR                | p-value |
| 0 (ref)          | 416           | 36.78      | 1.0               | 1.0                 |         | 1.0               |         |
| 1                | 362           | 32.87      | 0.9<br>(0.7, 1.1) | 0.9<br>(0.7, 1.1)   | 0.1953  | 0.9<br>(0.7, 1.1) | 0.1952  |
| 2                | 1028          | 35.02      | 1.0<br>(0.8, 1.1) | 1.0<br>(0.8, 1.2)   | 0.2133  | 1.0<br>(0.8, 1.2) | 0.9735  |
| 3                | 742           | 45.15      | 1.2<br>(1.0, 1.5) | 1.1<br>(1.0, 1.4)   | 0.9802  | 1.1<br>(0.9, 1.3) | 0.1995  |
| 4                | 380           | 44.21      | 1.2<br>(1.0, 1.5) | 1.1<br>(0.9, 1.3)   | 0.1398  | 1.0<br>(0.9, 1.3) | 0.6737  |
| 5-12             | 300           | 51.33      | 1.4<br>(1.1, 1.7) | 1.1<br>(0.9, 1.3)   | 0.6021  | 1.1<br>(0.9, 1.3) | 0.4823  |

\*adjusted for age, BMI, race, education, occupation, injury/surgery, estrogen use, clinical site. KR was considered to be prevalent ROA.

Appendix Table A2: Parity and incident TFROA over 30 months, including new KR, with zero births as referent.

| Number of Births   | Total # Knees | % With incident ROA | Crude             | Age, BMI, race-Adj. |         | Multi-Adj.*       |         |
|--------------------|---------------|---------------------|-------------------|---------------------|---------|-------------------|---------|
|                    |               |                     | RR                | RR                  | p-value | RR                | p-value |
| 0 (ref)            | 263           | 6.84                | 1.0               | 1.0                 |         | 1.0               |         |
| 1                  | 241           | 5.39                | 0.8<br>(0.4, 1.6) | 0.8<br>(0.4, 1.7)   | 0.5628  | 0.8<br>(0.4, 1.6) | 0.5164  |
| 2                  | 657           | 6.09                | 0.9<br>(0.5, 1.6) | 1.0<br>(0.6, 1.8)   | 0.9861  | 1.0<br>(0.6, 1.8) | 0.9708  |
| 3                  | 407           | 7.13                | 1.0<br>(0.6, 1.8) | 1.1<br>(0.6, 2.0)   | 0.7160  | 1.2<br>(0.6, 2.2) | 0.6552  |
| 4                  | 212           | 8.02                | 1.2<br>(0.6, 2.3) | 1.2<br>(0.6, 2.3)   | 0.5908  | 1.3<br>(0.6, 2.6) | 0.4820  |
| 5-12               | 143           | 11.89               | 1.7<br>(0.9, 3.4) | 1.7<br>(0.9, 3.4)   | 0.1201  | 2.0<br>(1.0, 3.9) | 0.0520  |
| P for linear trend |               |                     |                   |                     |         |                   | 0.0355  |

\*adjusted for age, BMI, race, education, occupation, injury/surgery, estrogen use, clinical site. New KR was considered to be incident ROA.

Appendix Table A3: Parity and 30-month incident KR, with zero births as referent.

| Number of Births   | Total # Knees | % With incident KR | Crude              | Age, BMI, race-Adj. |         | Multi-Adj.*       |         |
|--------------------|---------------|--------------------|--------------------|---------------------|---------|-------------------|---------|
|                    |               |                    | RR                 | RR                  | p-value | RR                | p-value |
| 0 (ref)            | 417           | 1.44               | 1.0                | 1.0                 |         | 1.0               | 0.5983  |
| 1                  | 358           | 1.96               | 1.4<br>(0.5, 4.4)  | 1.4<br>(0.4, 4.6)   | 0.5540  | 0.6<br>(0.1, 3.9) | 0.5983  |
| 2                  | 1013          | 3.26               | 2.3<br>(1.0, 5.5)  | 2.5<br>(1.0, 6.1)   | 0.0419  | 1.8<br>(0.8, 4.2) | 0.1715  |
| 3                  | 732           | 5.19               | 3.7<br>(1.5, 8.8)  | 3.5<br>(1.4, 8.4)   | 0.0056  | 2.3<br>(1.0, 5.4) | 0.0536  |
| 4                  | 373           | 3.75               | 2.7<br>(1.0, 7.2)  | 2.4<br>(0.9, 6.7)   | 0.0884  | 1.9<br>(0.7, 5.1) | 0.1992  |
| 5-12               | 298           | 5.70               | 4.0<br>(1.5, 10.2) | 3.2<br>(1.2, 8.4)   | 0.0215  | 2.4<br>(0.9, 6.2) | 0.0781  |
| P for linear trend |               |                    |                    |                     |         |                   | 0.0164  |

\*adjusted for age, BMI, race, education, occupation, WOMAC knee pain, pain medication, estrogen use, clinical site

Appendix Table A4. Parity reported at 30M and loss to follow-up at 60M clinic visit among women who had parity information reported

Eligible subjects: all women who came to 30M clinic visit and reported parity information

| Parity reported at 30M visit | N of women | N(%) of women <u>lost to follow-up at 60M</u> | binary regression model - crude                |         | binary regression model – adj. age, BMI, race, clinic site |         |
|------------------------------|------------|-----------------------------------------------|------------------------------------------------|---------|------------------------------------------------------------|---------|
|                              |            |                                               | RR of <u>loss to follow-up at 60M</u> (95% CI) | p-value | RR of <u>loss to follow-up at 60M</u> (95% CI)             | p-value |
| <b>0</b>                     | 205        | 26 (12.68)                                    | 1.0                                            |         | 1.0                                                        |         |
| <b>1</b>                     | 179        | 24 (13.41)                                    | 1.1 (0.6,1.8)                                  | 0.8332  | 1.1 (0.6,1.8)                                              | 0.8152  |
| <b>2</b>                     | 506        | 71 (14.03)                                    | 1.1 (0.7,1.7)                                  | 0.6364  | 1.1 (0.7,1.7)                                              | 0.5822  |
| <b>3</b>                     | 362        | 56 (15.47)                                    | 1.2 (0.8,1.9)                                  | 0.3680  | 1.2 (0.7,1.8)                                              | 0.5187  |
| <b>4</b>                     | 188        | 26 (13.83)                                    | 1.1 (0.7,1.8)                                  | 0.7375  | 1.0 (0.6,1.7)                                              | 0.9868  |
| <b>5-12</b>                  | 144        | 26 (18.06)                                    | 1.4 (0.9,2.3)                                  | 0.1663  | 1.2 (0.7,2.0)                                              | 0.5213  |
